# Supplementary material for: Magnetic molecularly imprinted polymers for the detection of aminopyralid in milk using dispersive solid-phase extraction
Source: Royal Society of Chemistry journal article supplement (doi:10.1039/c9ra05782j), 2019-01-01
Supplement: c9ra05782j1.pdf [file c9ra05782j1.pdf]

## Supporting Information

**Magnetic molecularly imprinted polymers for the detection of aminopyralid in milk using dispersive solid-phase extraction**

**Yahui He<sup>1,2\*</sup>, Sijia Tan<sup>2</sup>, A. M. Abd El-Aty<sup>3,4</sup>, Ahmet Hacımüftüoğlu<sup>4</sup>, Yongxin She<sup>2\*\*</sup>**

*<sup>1</sup>Beijing Technology and Business University, 100048, P.R. China*

*<sup>2</sup>Institute of Quality Standards & Testing Technology for Agro-Products, Chinese Academy of Agricultural Sciences, Beijing 100081, P.R. China*

*<sup>3</sup>Department of Pharmacology, Faculty of Veterinary Medicine, Cairo University, 12211-Giza, Egypt*

*<sup>4</sup>Department of Medical Pharmacology, Medical Faculty, Ataturk University, 25240-Erzurum, Turkey*

### **Corresponding authors:**

*\*(Y.H.) Tel: +86 01068985456; Fax: +86 010 68985456. E-mail: [hyh@btbu.edu.cn](mailto:hyh@btbu.edu.cn)*

*\*\* (Y.S.) Tel: +86 010 82106513; Fax: +86 010 82106567. E-mail: [sheyongxin@caas.cn](mailto:sheyongxin@caas.cn)*

**Table S1.** The design and optimization of the polymerization system

| Template     | Functional monomer | Cross-linker | Porogen         | Molar ratio | Adsorption quantity ( $\mu\text{g}\cdot\text{g}^{-1}$ ) |
|--------------|--------------------|--------------|-----------------|-------------|---------------------------------------------------------|
| aminopyralid | 4-VP               | TRIM         | Methanol        | 1:2:6       | 1297.5                                                  |
|              |                    |              |                 | 1:4:6       | 1348.2                                                  |
|              |                    |              |                 | 1:6:6       | 1403.1                                                  |
| aminopyralid | 4-VP               | TRIM         | Methanol        | 1:2:10      | 1228.4                                                  |
|              |                    |              |                 | 1:4:10      | 1232.1                                                  |
|              |                    |              |                 | 1:6:10      | 1303.7                                                  |
| aminopyralid | 4-VP               | EGDMA        | Methanol        | 1:2:20      | 892.3                                                   |
|              |                    |              |                 | 1:4:20      | 942.5                                                   |
|              |                    |              |                 | 1:6:20      | 992.6                                                   |
| aminopyralid | 4-VP               | TRIM         | Dichloromethane | 1:2:6       | 863.2                                                   |
|              |                    |              |                 | 1:4:6       | 720.1                                                   |
|              |                    |              |                 | 1:6:6       | 792.4                                                   |
| aminopyralid | 4-VP               | TRIM         | Dichloromethane | 1:2:10      | 817.5                                                   |
|              |                    |              |                 | 1:4:10      | 735.2                                                   |
|              |                    |              |                 | 1:6:10      | 808.3                                                   |
| aminopyralid | MAA                | TRIM         | Methanol        | 1:2:6       | 1001.5                                                  |
|              |                    |              |                 | 1:4:6       | 1209.2                                                  |
|              |                    |              |                 | 1:6:6       | 1159.9                                                  |
| aminopyralid | MAA                | TRIM         | Methanol        | 1:2:10      | 953.9                                                   |
|              |                    |              |                 | 1:4:10      | 1025.0                                                  |
|              |                    |              |                 | 1:6:10      | 939.1                                                   |
| aminopyralid | MAA                | EGDMA        | Methanol        | 1:2:20      | 704.2                                                   |
|              |                    |              |                 | 1:4:20      | 967.3                                                   |
|              |                    |              |                 | 1:6:20      | 883.4                                                   |

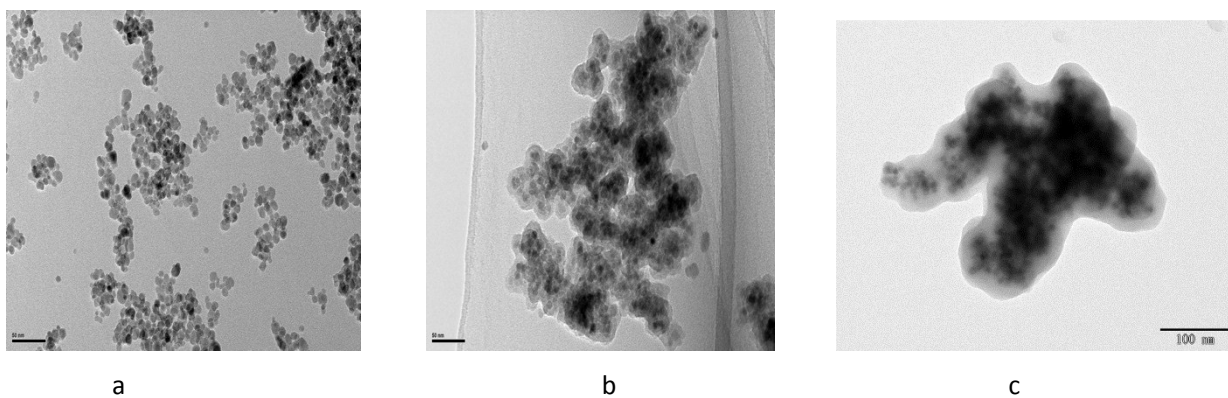

**Fig.S1** the TEM images of Fe<sub>3</sub>O<sub>4</sub>(a), Fe<sub>3</sub>O<sub>4</sub>@SiO<sub>2</sub>-COOH(b), and Fe<sub>3</sub>O<sub>4</sub>@SiO<sub>2</sub>-NH<sub>2</sub>@NIP(c).

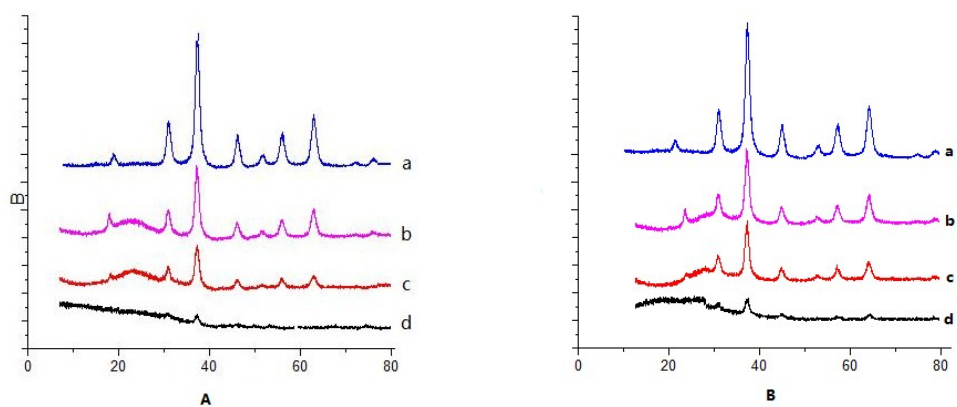

**Fig. S2. A.** The XRD patterns of Fe<sub>3</sub>O<sub>4</sub> nanoparticles(a), Fe<sub>3</sub>O<sub>4</sub>@SiO<sub>2</sub> (b), Fe<sub>3</sub>O<sub>4</sub>@SiO<sub>2</sub>-COOH (c), Fe<sub>3</sub>O<sub>4</sub>@SiO<sub>2</sub>-COOH@MIP (d)

**B.** The XRD patterns of Fe<sub>3</sub>O<sub>4</sub> nanoparticles(a), Fe<sub>3</sub>O<sub>4</sub>@SiO<sub>2</sub> (b), Fe<sub>3</sub>O<sub>4</sub>@SiO<sub>2</sub>-NH<sub>2</sub> (c), Fe<sub>3</sub>O<sub>4</sub>@SiO<sub>2</sub>-NH<sub>2</sub>@MIP (d)

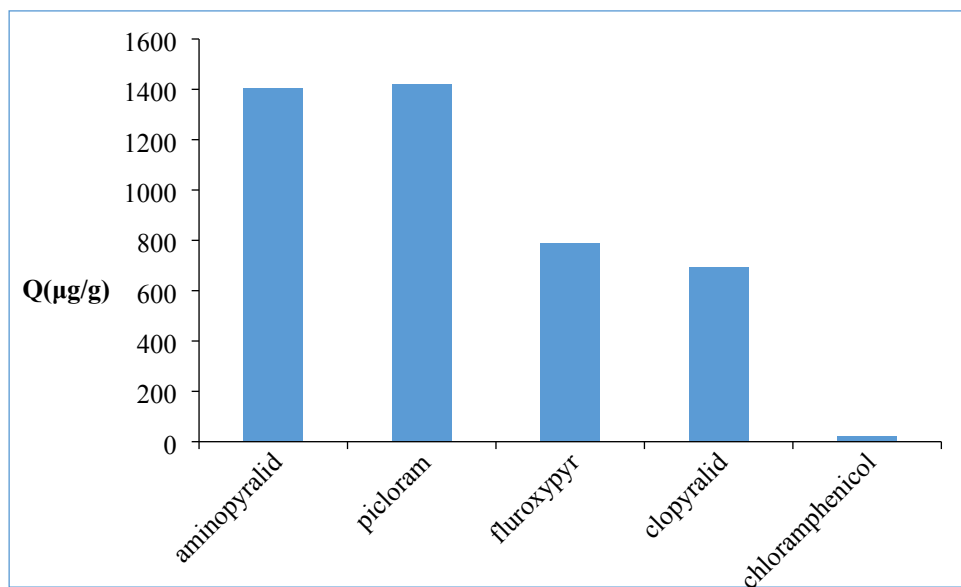

Fig.S3. the selectivity of MMIP
